# Supplementary material for: A Versatile Processing Workflow to Enable Pathogen Detection in Clinical Samples from Organs Using VIDISCA
Source: MDPI journal article supplement (doi:10.3390/diagnostics11050791), 2021-04-27
Supplement: s1 [file s1]

## Supplementary Materials

### A Versatile Processing Workflow to Enable Pathogen Detection in Clinical Samples from Organs Using VIDISCA

| Sample |         | Total Reads | rRNA Ct-Value | Virus Detected | Read Number |
|--------|---------|-------------|---------------|----------------|-------------|
| Organ  | Species |             |               |                |             |
| Spleen | Swine   | 2858        | 20.16         | APPV           | 3           |
| Brain  | Swine   | 19634       | 18.72         | APPV           | 1           |

**Table S1.** Spleen and brain tissues from the same necropsied animals were processed using workflow 4 followed by two Capto™ Core 700 purification rounds. The protocol allowed detection of APPV via VIDISCA-NGS.

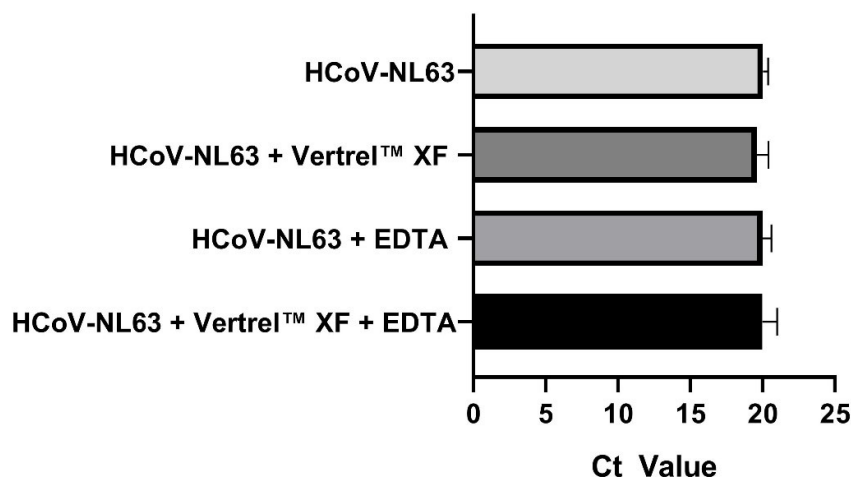

**Figure S1.** The effect of Vertrel™ XF organic extraction, EDTA treatment and Vertrel™ XF organic extraction combined with EDTA treatment on the activity of RT-qPCR enzymes was tested on HCoV-NL63 samples. The graph shows the mean Ct value and standard deviation of the samples tested. No statistically significant difference was found between the treatment conditions and the control (One-way ANOVA;  $p$ -value = 0.8886).

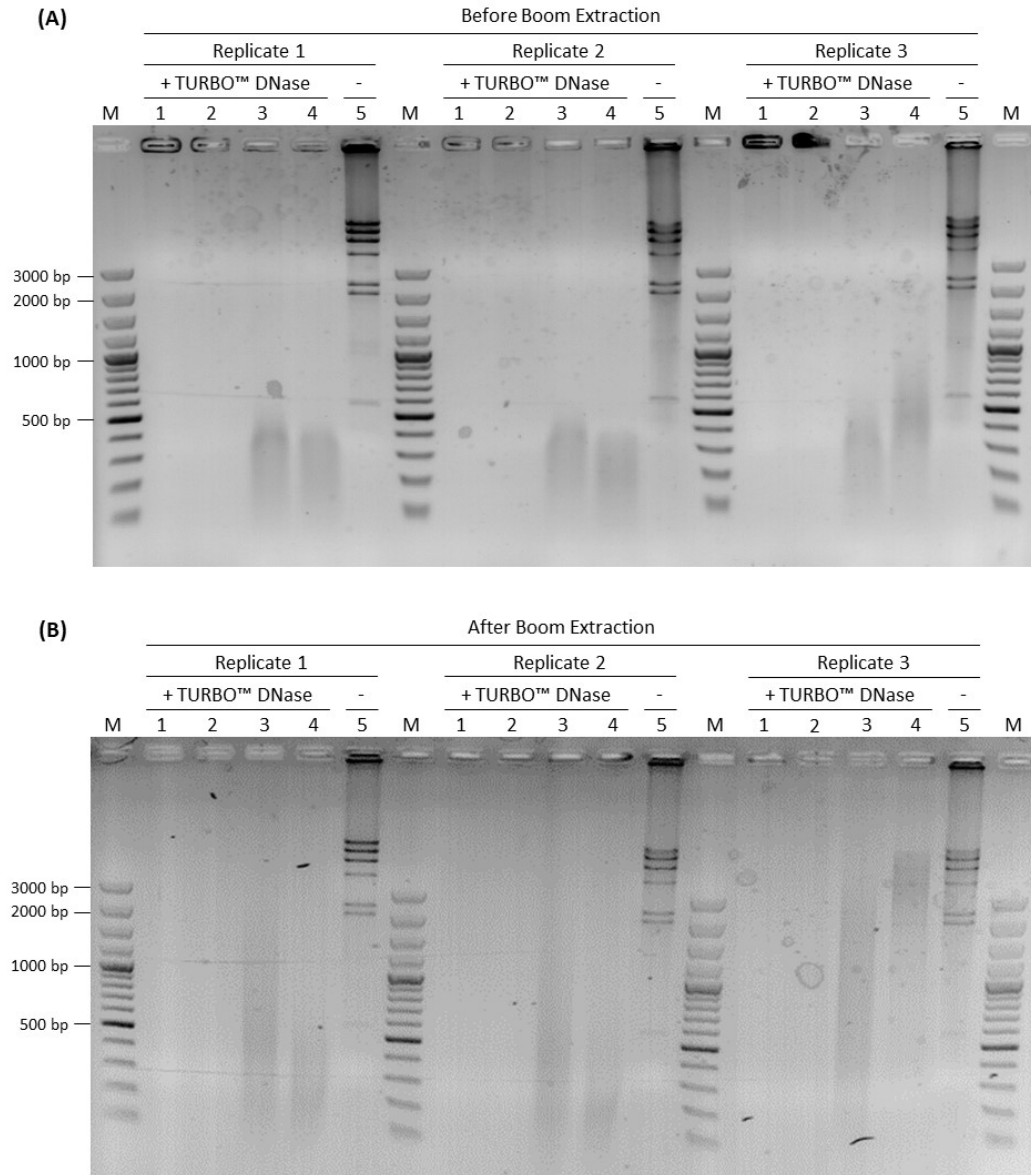

**Figure S2.** The effect of Vertrel™ XF organic extraction, EDTA treatment, and Vertrel™ XF organic extraction combined with EDTA treatment on the activity of TURBO™ DNase enzyme was tested on a Lambda DNA HindIII digested marker. Experiments were performed in triplicate. **(A)** Samples before Boom extraction. **(B)** Samples after Boom extraction. M: DNA ladder; 1: untreated Lambda DNA HindIII digested marker; 2: Lambda DNA HindIII digested marker + Vertrel™ XF; 3: Lambda DNA HindIII digested marker + EDTA; 4: Lambda DNA HindIII digested marker + Vertrel™ XF + EDTA; 5: Lambda DNA HindIII digested marker without TURBO™ DNase treatment.
